# Supplementary material
Source: MDPI journal article supplement (https://www.mdpi.com/2073-4352/12/10/1434)
Supplement: s1 [file s1]

# Magnesium coordination chemistry: a case study of magnesium carboxylate complexes with hexamethylenetetramine

Tomasz Sierański, Agata Trzęsowska-Kruszyńska, Marcin Świątkowski, Marta Bogdan, Paulina Sobczak

Institute of General and Ecological Chemistry, Lodz University of Technology, Zeromskiego 116, PL-90924, Lodz, Poland

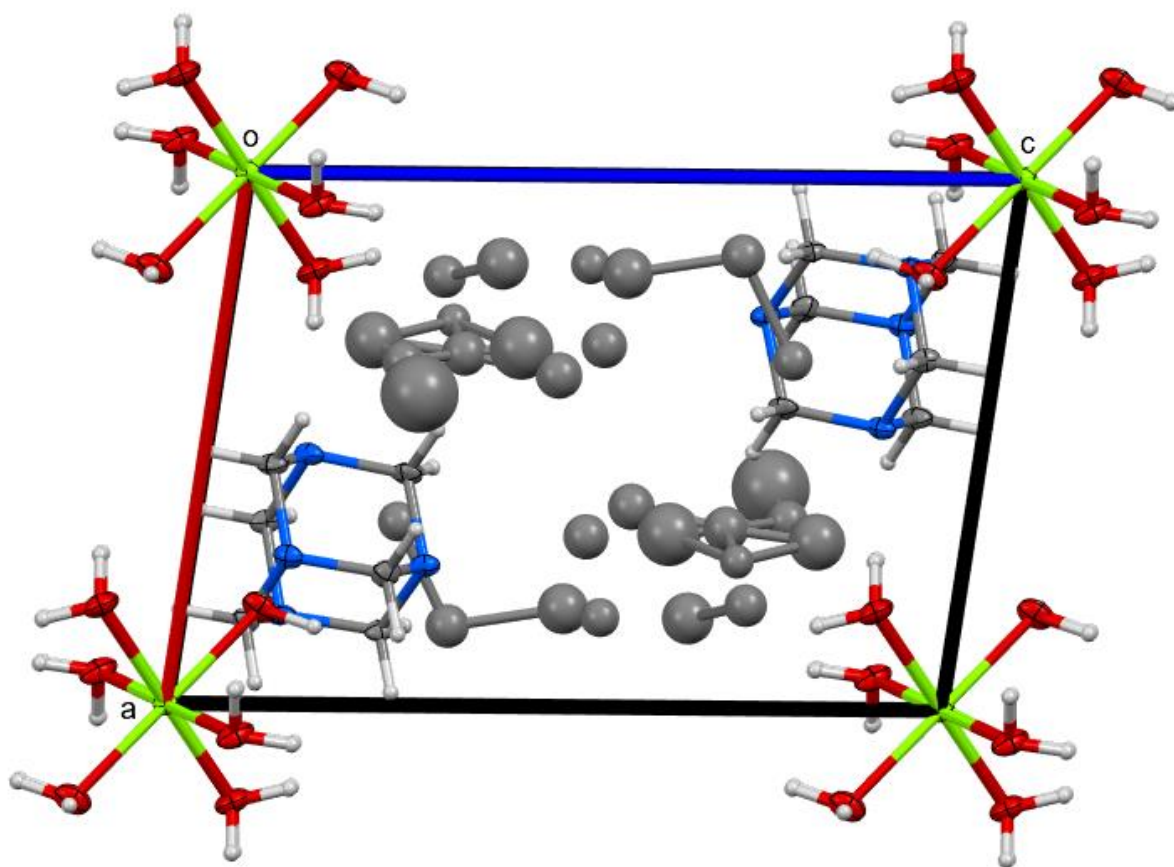

Figure S1. Unit cell of **2** showing the unsolvable disorder in the outer coordination sphere.

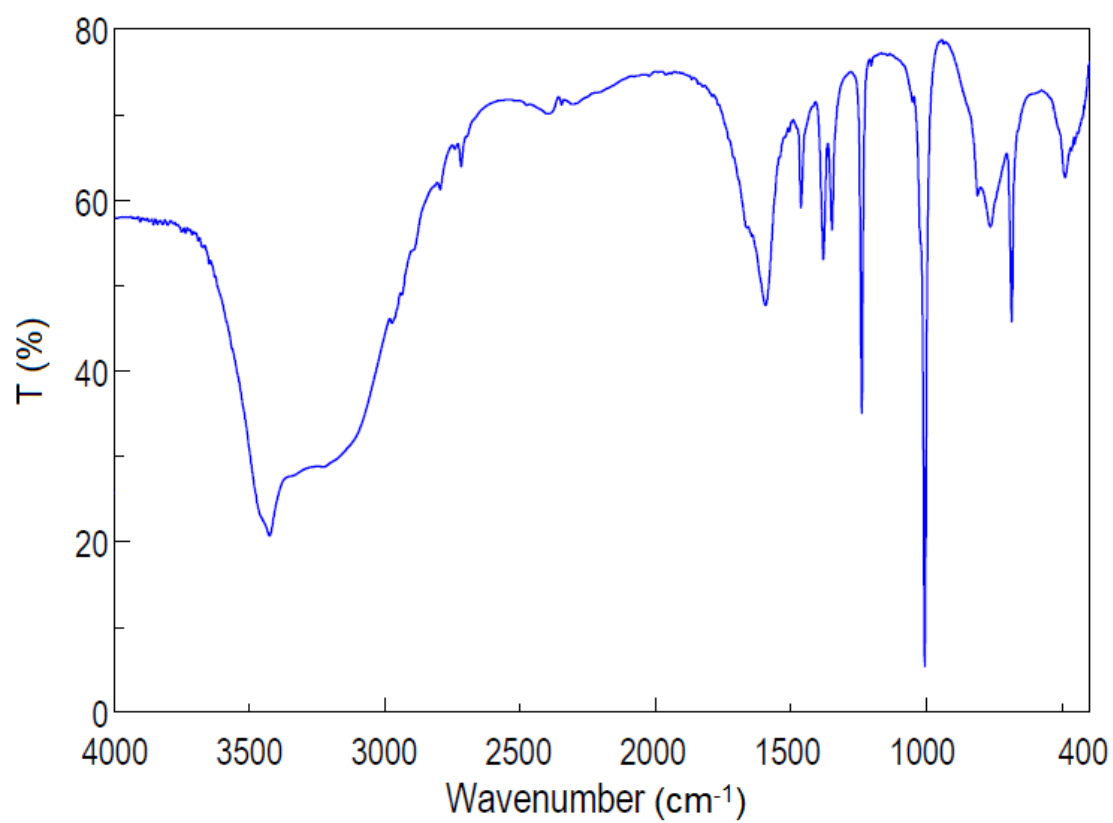

Figure S2. IR spectrum of **1**

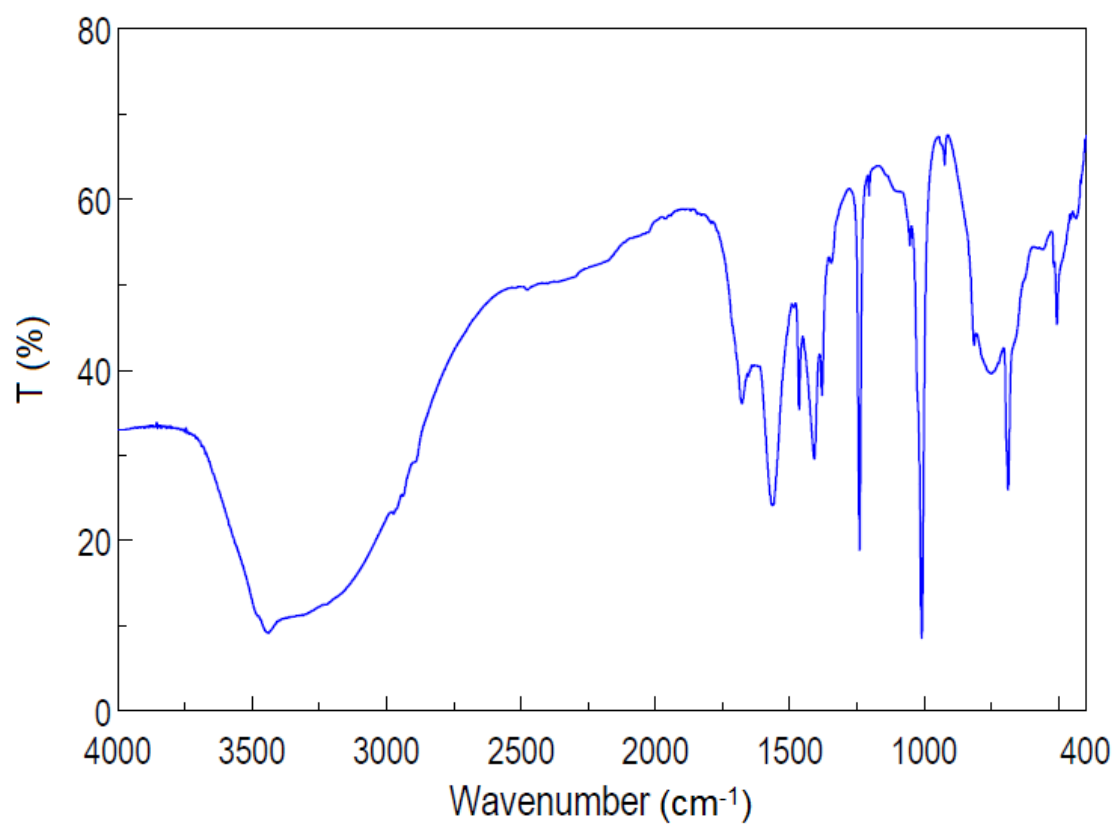

Figure S3. IR spectrum of **2**

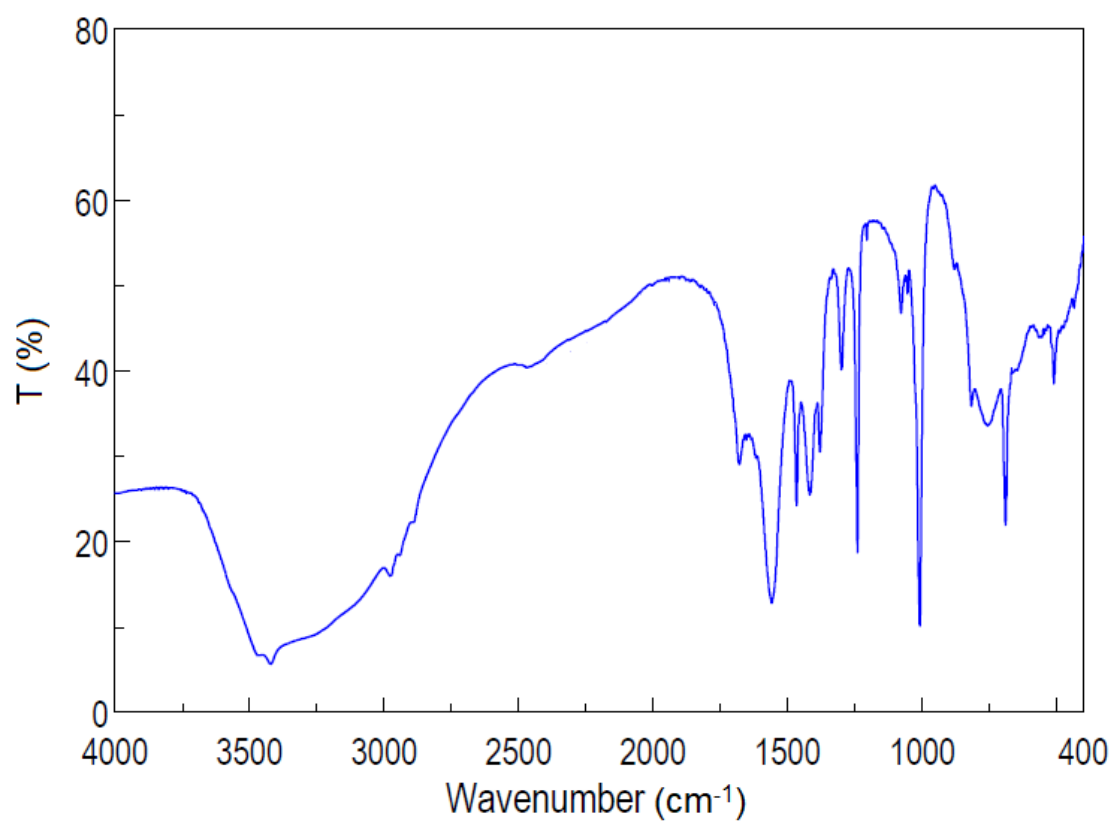

Figure S4. IR spectrum of **3**

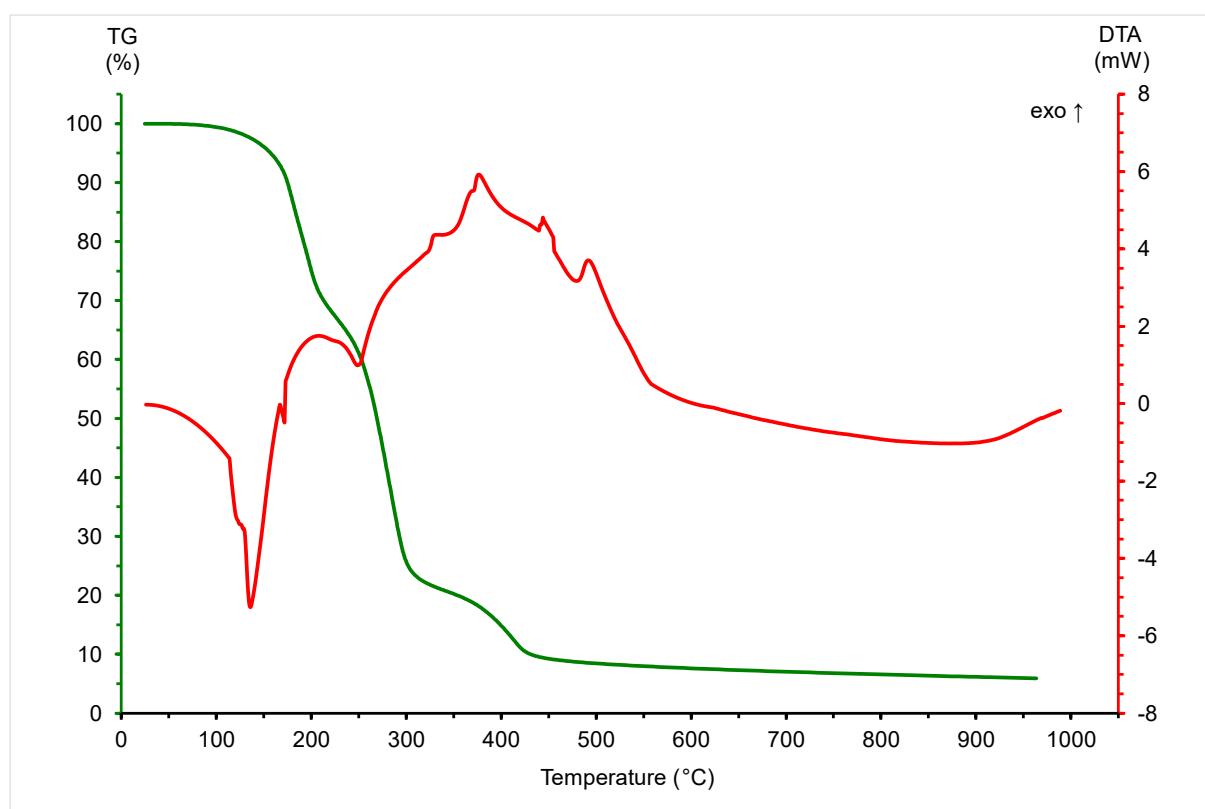

Figure S5. TG and DTA curves of **1**

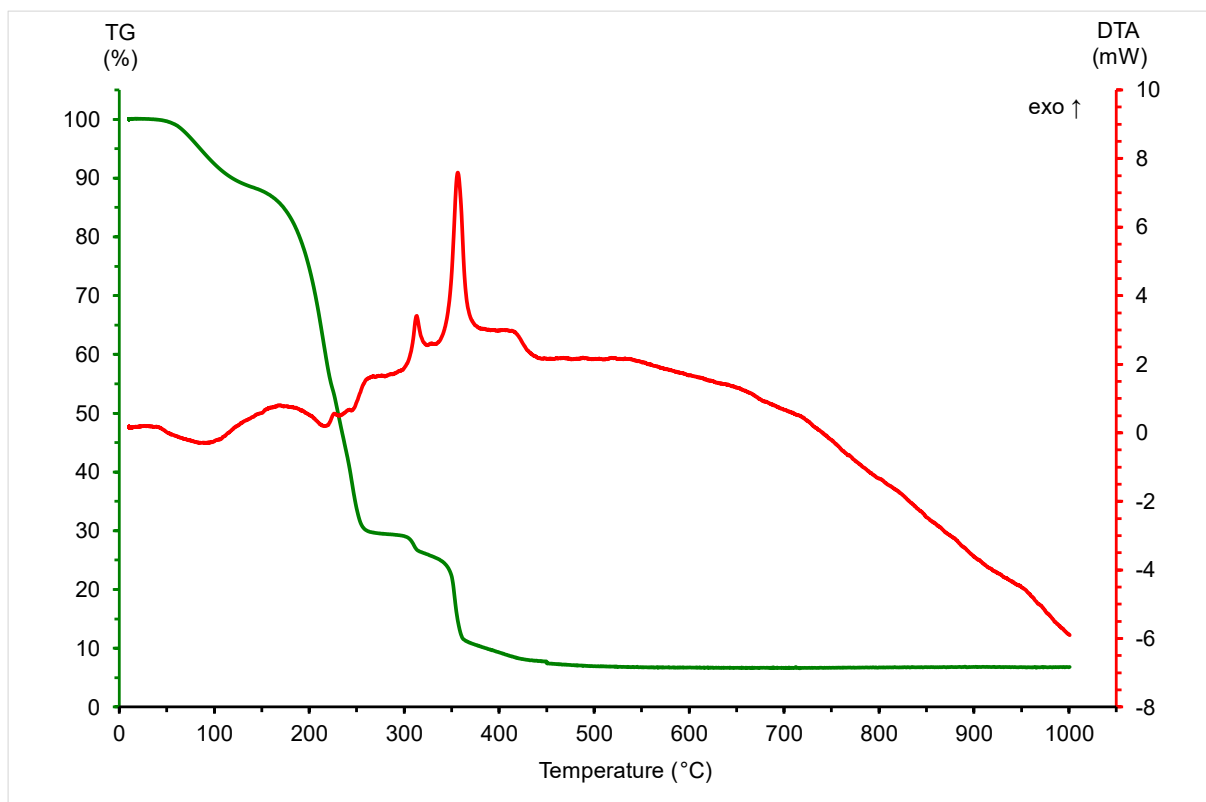

Figure S6. TG and DTA curves of 2

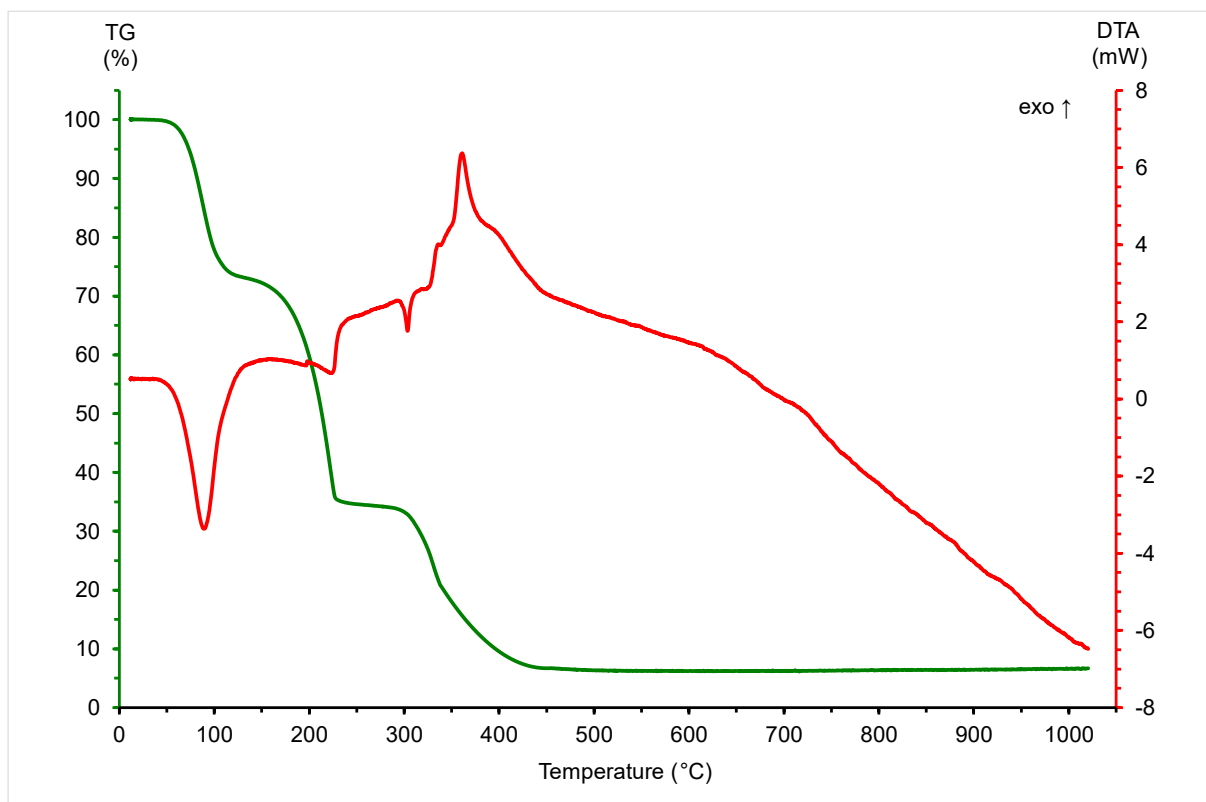

Figure S7. TG and DTA curves of 3
